# Supplementary material for: Tetrahedral MII based binuclear double-stranded helicates: single-ion-magnet and fluorescence behaviour
Source: Royal Society of Chemistry journal article supplement (doi:10.1039/c5dt04173b), 2016-01-01
Supplement: c5dt04173b1.pdf [file c5dt04173b1.pdf]

*Supporting Information*

**Tetrahedral M<sup>II</sup> based Binuclear Double-Stranded Helicates: Single-Ion-Magnet and Fluorescent Behaviour**

**Amit Kumar Mondal, Vijay Singh Parmar, Soumava Biswas, Sanjit Konar\***

*Department of Chemistry, IISER Bhopal, Bhopal By-Pass Road, Bhauri, Bhopal 462066, M. P., India.*

**Table S1.** X-ray Crystallographic Data and Refinement Parameters for complexes **1**, **2**, **3** and **4**.

|                                          | <b>1</b>                                                                      | <b>2</b>                                                                        | <b>3</b>                                                                      | <b>4</b>                                                                       |
|------------------------------------------|-------------------------------------------------------------------------------|---------------------------------------------------------------------------------|-------------------------------------------------------------------------------|--------------------------------------------------------------------------------|
| Formula                                  | C <sub>56</sub> H <sub>42</sub> Co <sub>2</sub> N <sub>6</sub> O <sub>6</sub> | C <sub>72</sub> H <sub>70</sub> Co <sub>2</sub> N <sub>10</sub> O <sub>10</sub> | C <sub>57</sub> H <sub>46</sub> Zn <sub>2</sub> N <sub>6</sub> O <sub>7</sub> | C <sub>68</sub> H <sub>64</sub> Zn <sub>2</sub> N <sub>8</sub> O <sub>10</sub> |
| M <sub>w</sub> (g mol <sup>-1</sup> )    | 1012.82                                                                       | 1353.24                                                                         | 1057.78                                                                       | 1284.05                                                                        |
| Crystal size (mm)                        | 0.45×0.18×0.16                                                                | 0.42×0.14×0.12                                                                  | 0.44×0.16×0.15                                                                | 0.45×0.15×0.10                                                                 |
| Crystal system                           | Triclinic                                                                     | Monoclinic                                                                      | Triclinic                                                                     | Monoclinic                                                                     |
| Space group                              | <i>P</i> -1                                                                   | <i>P</i> 2 <sub>1</sub> / <i>n</i>                                              | <i>P</i> -1                                                                   | <i>C</i> 2/ <i>c</i>                                                           |
| T (K)                                    | 140(2)                                                                        | 120(2)                                                                          | 140(2)                                                                        | 296(2)                                                                         |
| a (Å)                                    | 10.563(5)                                                                     | 14.360(4)                                                                       | 14.061(4)                                                                     | 23.8383(8)                                                                     |
| b (Å)                                    | 13.972(5)                                                                     | 20.040(5)                                                                       | 14.295(4)                                                                     | 13.1878(5)                                                                     |
| c (Å)                                    | 18.013(6)                                                                     | 24.583(7)                                                                       | 14.799(4)                                                                     | 20.3490(6)                                                                     |
| α (°)                                    | 67.788(10)                                                                    | 90                                                                              | 70.968(9)                                                                     | 90                                                                             |
| β (°)                                    | 76.918(10)                                                                    | 103.796(8)                                                                      | 65.639(8)                                                                     | 110.454(2)                                                                     |
| γ (°)                                    | 80.174(11)                                                                    | 90                                                                              | 70.068(9)                                                                     | 90                                                                             |
| V (Å <sup>3</sup> )                      | 2386.6(16)                                                                    | 6871(3)                                                                         | 2487.0(12)                                                                    | 5993.9(4)                                                                      |
| Z                                        | 2                                                                             | 4                                                                               | 2                                                                             | 4                                                                              |
| ρ <sub>calcd</sub> (g cm <sup>-3</sup> ) | 1.409                                                                         | 1.308                                                                           | 1.413                                                                         | 1.423                                                                          |
| μ(MoKα) (mm <sup>-1</sup> )              | 0.754                                                                         | 0.548                                                                           | 1.025                                                                         | 0.869                                                                          |
| <i>F</i> (000)                           | 1044                                                                          | 2824                                                                            | 1092                                                                          | 2672                                                                           |
| T <sub>max</sub> , T <sub>min</sub>      | 0.896, 0.840                                                                  | 0.936, 0.912                                                                    | 0.867, 0.831                                                                  | 0.927, 0.865                                                                   |
| h, k, l range                            | -12 ≤ <i>h</i> ≤ 12, -16 ≤<br><i>k</i> ≤ 16, -21 ≤ <i>l</i> ≤ 21              | -17 ≤ <i>h</i> ≤ 17, -24 ≤ <i>k</i><br>≤ 24, -29 ≤ <i>l</i> ≤ 29                | -19 ≤ <i>h</i> ≤ 19, -19 ≤ <i>k</i><br>≤ 19, -20 ≤ <i>l</i> ≤ 20              | -28 ≤ <i>h</i> ≤ 28, -15 ≤ <i>k</i><br>≤ 15, -24 ≤ <i>l</i> ≤ 24               |
| Collected reflections                    | 8495                                                                          | 12273                                                                           | 12655                                                                         | 5286                                                                           |
| Independent reflections                  | 6916                                                                          | 7614                                                                            | 9793                                                                          | 3946                                                                           |
| Goodness-of-fit (GOF) on F <sup>2</sup>  | 1.031                                                                         | 1.035                                                                           | 0.945                                                                         | 1.082                                                                          |
| R1, wR2 (I > 2σI)                        | 0.0322, 0.0772                                                                | 0.0641, 0.1332                                                                  | 0.0373, 0.1152                                                                | 0.0621, 0.1747                                                                 |
| R1, wR2 (all data)                       | 0.0458, 0.0833                                                                | 0.1231, 0.1632                                                                  | 0.0570, 0.1317                                                                | 0.0824, 0.1901                                                                 |
| CCDC Number                              | 1429966                                                                       | 1429967                                                                         | 1429968                                                                       | 1429969                                                                        |

$$R1 = \sum ||F_o| - |F_c|| / \sum |F_o| \text{ and } wR2 = \sqrt{\sum w(|F_o|^2 - |F_c|^2)^2} / \sum w(F_o)^2}^{1/2}$$

**Table S2.** Bond distances (Å) around Co<sup>II</sup> and Zn<sup>II</sup> centers found in **1**, **2**, **3** and **4**.

| 1        |        | 2        |        | 3        |        | 4          |        |
|----------|--------|----------|--------|----------|--------|------------|--------|
| Co2 - O2 | 1.9031 | Co2 - O5 | 1.9220 | Zn1 - O4 | 1.9068 | Zn1 - O2   | 1.9056 |
| Co2 - O1 | 1.8975 | Co2 - O6 | 1.9049 | Zn1 - O3 | 1.9064 | Zn1 - O8   | 1.9105 |
| Co2 - N5 | 1.9882 | Co2 - N4 | 2.0027 | Zn1 - N2 | 2.0168 | Zn1 - N1   | 2.0096 |
| Co2 - N6 | 1.9914 | Co2 - N3 | 1.9905 | Zn1 - N1 | 2.0169 | Zn1 - N3   | 2.0128 |
| Co1 - O6 | 1.8947 | Co1 - O2 | 1.9041 | Zn2 - O2 | 1.9042 | Zn1' - O2' | 1.9056 |
| Co1 - O5 | 1.8974 | Co1 - O1 | 1.9011 | Zn2 - O1 | 1.9215 | Zn1' - O8' | 1.9105 |
| Co1 - N2 | 1.9964 | Co1 - N1 | 1.9969 | Zn2 - N5 | 2.0146 | Zn1' - N1' | 2.0096 |
| Co1 - N1 | 1.9833 | Co1 - N2 | 1.9850 | Zn2 - N6 | 2.0098 | Zn1' - N3' | 2.0128 |

**Table S3.** Bond angles around Co<sup>II</sup> and Zn<sup>II</sup> centers found in **1**, **2**, **3** and **4**.

| 1             |        | 2             |        | 3             |        | 4                |        |
|---------------|--------|---------------|--------|---------------|--------|------------------|--------|
| O2 - Co2 - O1 | 116.00 | O5 - Co2 - O6 | 110.04 | O4 - Zn1 - O3 | 115.21 | O2 - Zn1 - N1    | 95.86  |
| O2 - Co2 - N5 | 124.01 | O6 - Co2 - N3 | 130.16 | O4 - Zn1 - N2 | 95.93  | O2 - Zn1 - O8    | 108.75 |
| O2 - Co2 - N6 | 96.13  | O5 - Co2 - N3 | 95.19  | O4 - Zn1 - N1 | 125.84 | O2 - Zn1 - N3    | 128.65 |
| O1 - Co2 - N5 | 96.19  | O6 - Co2 - N4 | 95.48  | O3 - Zn1 - N2 | 122.79 | N1 - Zn1 - O8    | 133.14 |
| O1 - Co2 - N6 | 123.96 | O5 - Co2 - N4 | 128.51 | O3 - Zn1 - N1 | 95.64  | N1 - Zn1 - N3    | 97.96  |
| N5 - Co2 - N6 | 102.09 | N4 - Co2 - N3 | 101.30 | N2 - Zn1 - N1 | 103.29 | O8 - Zn1 - N3    | 96.68  |
| O6 - Co1 - O5 | 117.80 | O2 - Co1 - O1 | 118.50 | O2 - Zn2 - O1 | 111.38 | O2' - Zn1' - N1' | 95.86  |
| O6 - Co1 - N2 | 122.81 | O2 - Co1 - N1 | 125.86 | O2 - Zn2 - N5 | 96.38  | O2' - Zn1' - O8' | 108.75 |
| O6 - Co1 - N1 | 95.44  | O2 - Co1 - N2 | 95.68  | O2 - Zn2 - N6 | 122.50 | O2' - Zn1' - N3' | 128.65 |
| O5 - Co1 - N2 | 96.35  | O1 - Co1 - N1 | 95.09  | O1 - Zn2 - N5 | 129.49 | N1' - Zn1' - O8' | 133.14 |
| O5 - Co1 - N1 | 120.74 | O1 - Co1 - N2 | 121.46 | O1 - Zn2 - N6 | 96.13  | N1' - Zn1' - N3' | 97.96  |
| N2 - Co1 - N1 | 104.90 | N1 - Co1 - N2 | 101.23 | N5 - Zn2 - N6 | 103.42 | O8' - Zn1' - N3' | 96.68  |

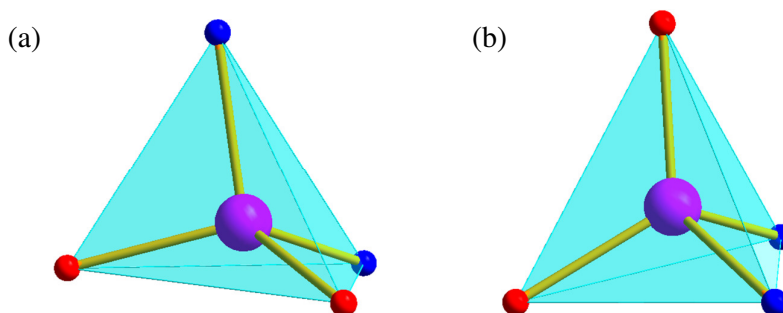**Fig. S1.** Distorted tetrahedral coordination geometry around the Co<sup>II</sup> centers in **1** (a) and **2** (b).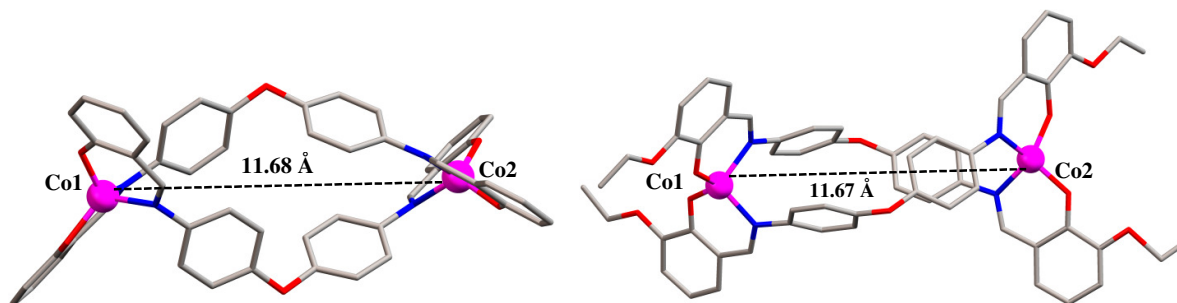**Fig. S2.** Intramolecular Co...Co distances within the binuclear helicates found in complexes **1** (left) and **2** (right).

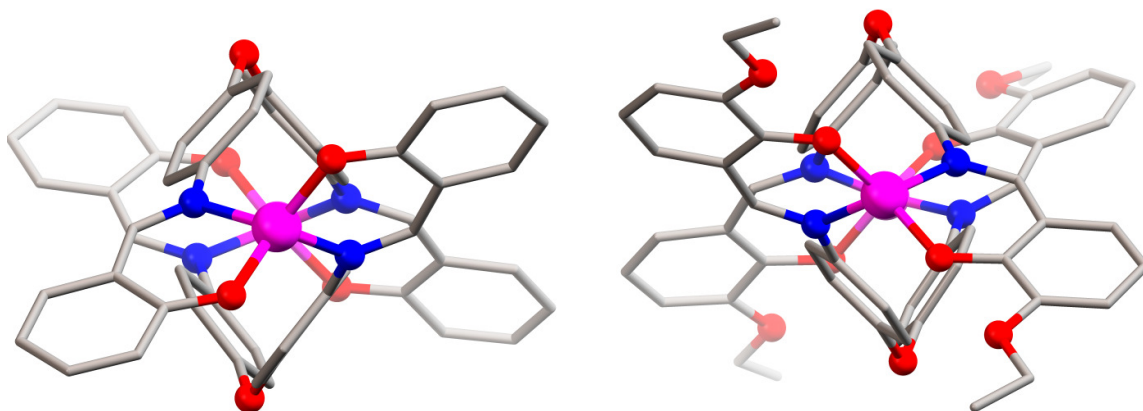

**Fig. S3.** A view down the Co...Co vector emphasizing the double stranded helical conformation of the complexes **1** (left) and **2** (right).

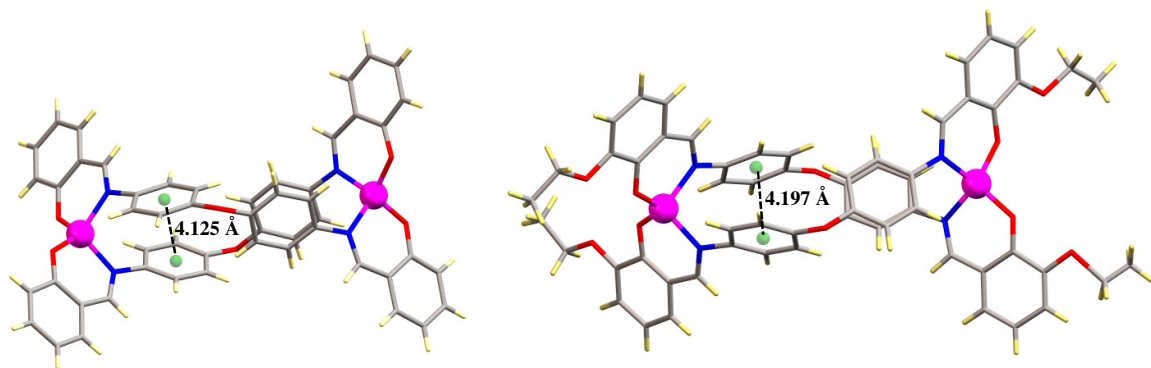

**Fig. S4.** Intramolecular  $\pi\cdots\pi$  interactions between the phenyl rings within the double stranded helicates found in complexes **1** (left) and **2** (right).

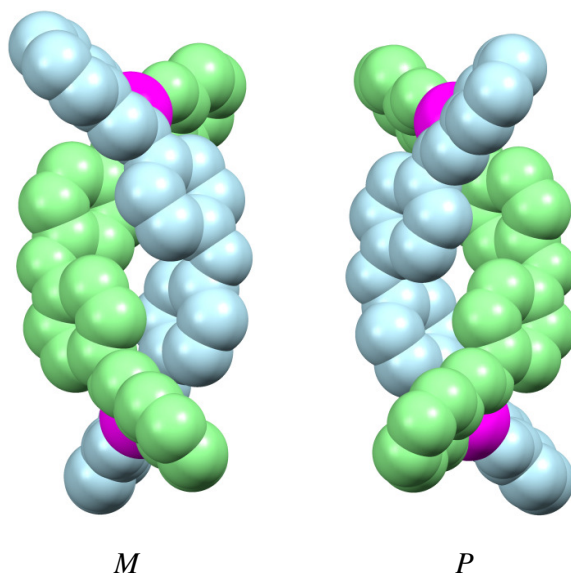

**Fig. S5.** Space-filling representations of the two independent  $[\text{Co}_2(\text{L}^1)_2]$  complexes found in complex **1** with *M*- and *P*-helicity.

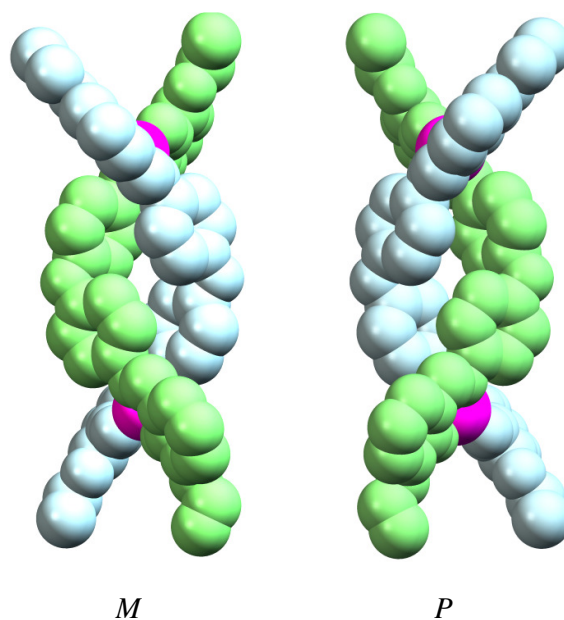

**Fig. S6.** Space-filling representations of the two independent  $[\text{Co}_2(\text{L}^2)_2]$  complexes found in complex **2** with *M*- and *P*-helicity.

**Table S4.** H-bond parameters found in complex **1**.

| D-H...A       | D-H(Å) | H...A(Å) | D...A (Å) | <D-H-A(°) | Symmetry <sup>#</sup> |
|---------------|--------|----------|-----------|-----------|-----------------------|
| C39-H39...O2  | 0.950  | 2.915    | 3.704     | 141.26    | 0                     |
| C32-H32...O6  | 0.950  | 2.877    | 3.675     | 142.25    | 0                     |
| C20-H20...O5  | 0.950  | 2.939    | 3.673     | 135.09    | 0                     |
| C36-H36...N4  | 0.950  | 2.631    | 3.498     | 151.98    | 0                     |
| C25-H25...N4  | 0.950  | 2.671    | 3.436     | 137.86    | 0                     |
| C50-H50...O1  | 0.950  | 2.971    | 3.459     | 113.30    | 1                     |
| C56-H56...O1  | 0.950  | 2.694    | 3.263     | 119.08    | 1                     |
| C27-H27A...O2 | 0.950  | 2.728    | 3.501     | 136.11    | 1                     |
| C43-H43...O2  | 0.950  | 2.828    | 3.263     | 108.93    | 2                     |
| C14-H14...N4  | 0.950  | 2.541    | 3.467     | 164.98    | 3                     |
| C2-H2...N3    | 0.950  | 2.883    | 3.639     | 137.39    | 4                     |
| C55-H55...O5  | 0.950  | 2.803    | 3.473     | 128.33    | 5                     |
| C54-H54...O6  | 0.950  | 2.649    | 3.538     | 155.99    | 5                     |
| C47-H47...O6  | 0.950  | 2.791    | 3.480     | 130.19    | 6                     |
| C47-H47...O5  | 0.950  | 2.801    | 3.576     | 139.37    | 6                     |

<sup>#</sup> (0) x,y,z (1) -x+1,-y+1,-z+2 (2) -x,-y+1,-z+2 (3) -x+1,-y+2,-z+1 (4) -x+1,-y+1,-z+1 (5) x,+y,+z+1 (6) x,+y-1,+z+1

**Table S5.** H-bond parameters found in complex **2**.

| D-H...A        | D-H(Å) | H...A(Å) | D...A (Å) | <D-H-A(°) | Symmetry <sup>#</sup> |
|----------------|--------|----------|-----------|-----------|-----------------------|
| C7-H7...O1     | 0.951  | 2.778    | 3.580     | 142.53    | 0                     |
| C68-H68...N1S  | 0.951  | 2.765    | 3.666     | 158.44    | 0                     |
| C79-H79A...N1S | 0.990  | 2.889    | 3.547     | 124.64    | 0                     |
| C9-H9...N2S    | 0.950  | 2.575    | 3.523     | 175.72    | 1                     |
| C43-H43...N2S  | 0.950  | 2.843    | 3.709     | 152.07    | 1                     |
| C50-H50...O10  | 0.949  | 2.818    | 3.475     | 127.17    | 2                     |
| C51-H51...O10  | 0.951  | 2.919    | 3.530     | 123.17    | 2                     |
| C65-H65...O8   | 0.950  | 2.747    | 3.632     | 155.16    | 3                     |
| C52-H52...O6   | 0.949  | 2.718    | 3.108     | 105.36    | 3                     |
| C52-H52...O8   | 0.949  | 2.669    | 3.565     | 157.59    | 3                     |
| C57-H57...N4   | 0.950  | 2.824    | 3.567     | 135.79    | 4                     |
| C61-H61...O4   | 0.949  | 2.970    | 3.823     | 150.24    | 5                     |
| C72-H72...O10  | 0.951  | 2.987    | 3.884     | 157.86    | 6                     |

<sup>#</sup> (0) x,y,z; (1) -x+1,-y+1,-z; (2) x-1/2,-y+1/2,+z-1/2; (3) -x+2,-y+1,-z; (4) -x+3/2,+y-1/2,-z+1/2; (5) -x+1,-y,-z; (6) x+1,+y,+z.

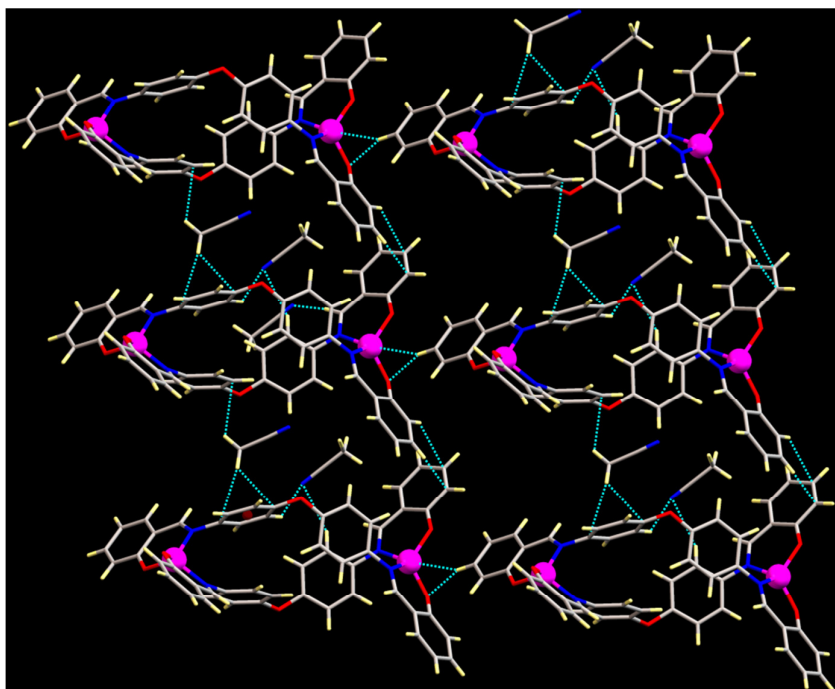

**Fig. S7.** A view of supramolecular 2D arrangement of complex **1** through intermolecular H-bonding and CH... $\pi$  interactions.

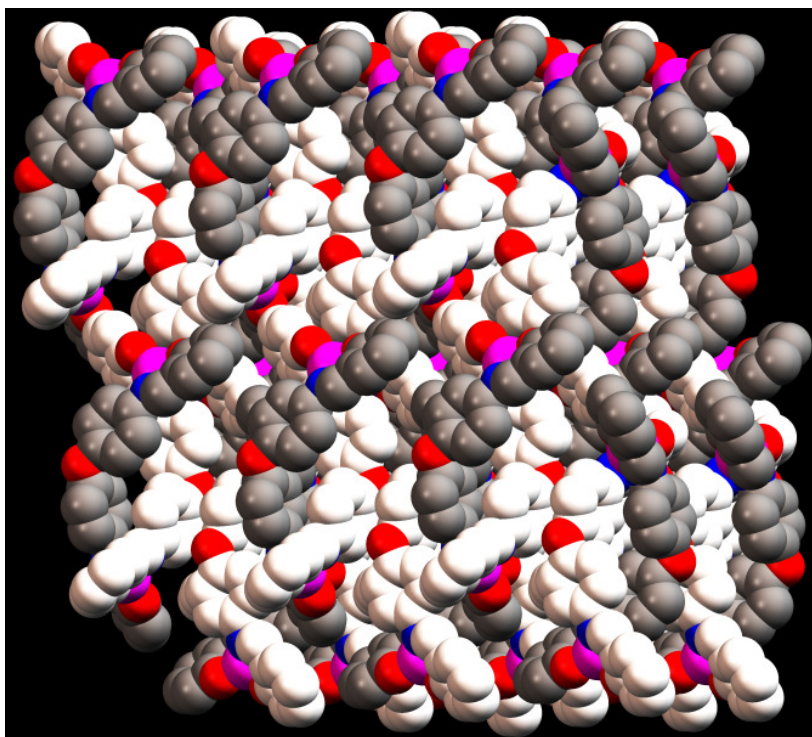

**Fig. S8.** A view of de-solvated framework of **1** emphasizing the supramolecular interactions.

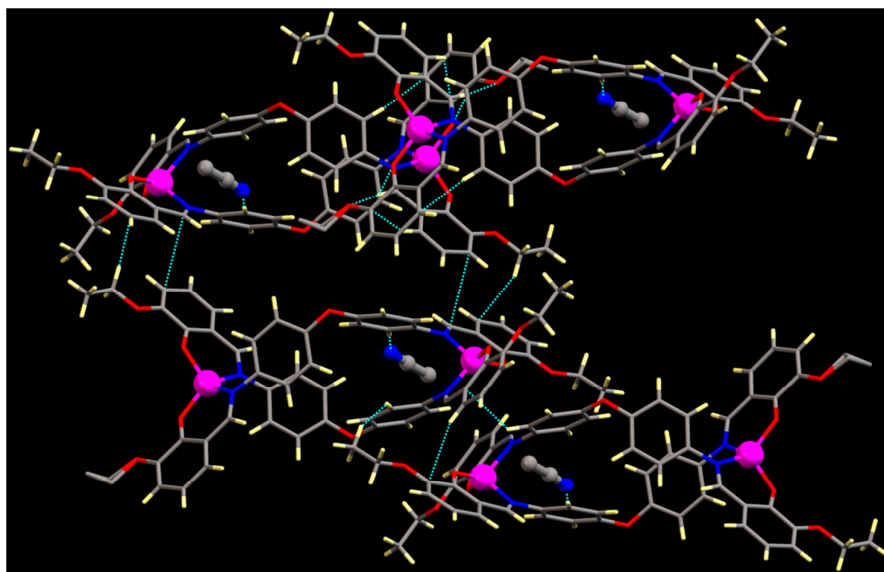

**Fig. S9.** A view of supramolecular 2D arrangement of complex **2** through intermolecular H-bonding and CH $\cdots$  $\pi$  interactions.

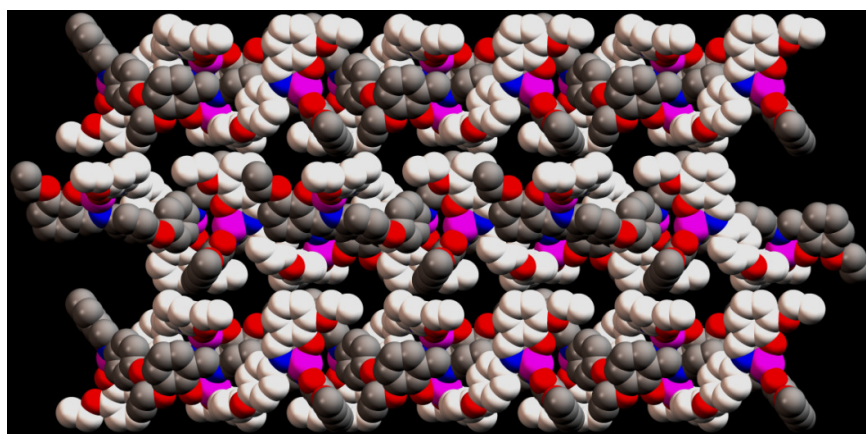

**Fig. S10.** A view of de-solvated framework of **2** emphasizing the supramolecular interactions.

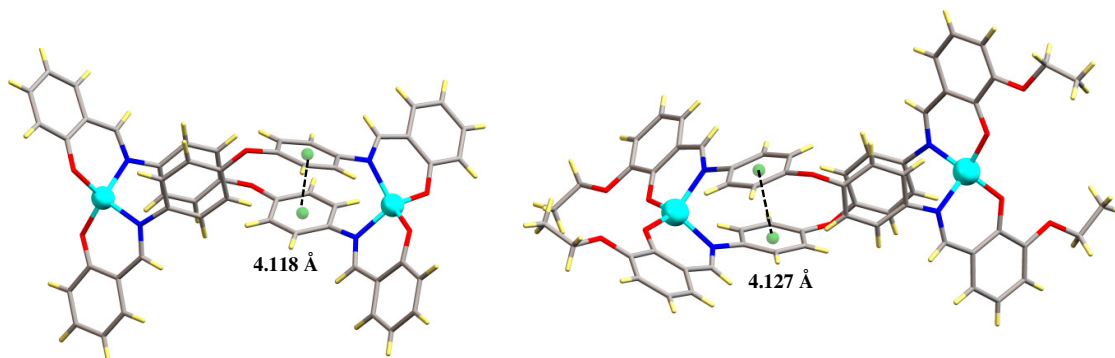

**Fig. S11.** Intramolecular  $\pi\cdots\pi$  interactions between the phenyl rings within the double stranded helicates found in complexes **3** (left) and **4** (right).

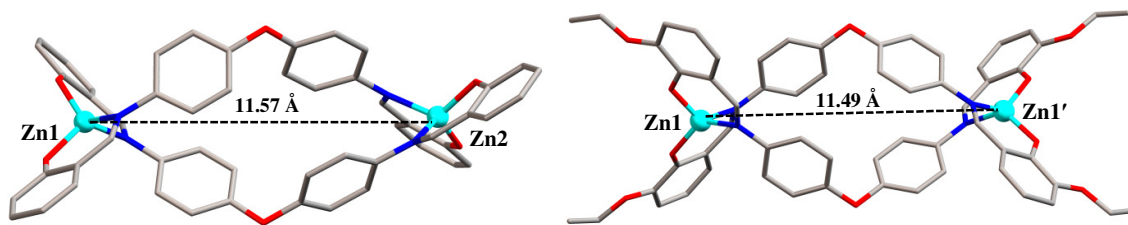

**Fig. S12.** Intramolecular Zn...Zn distances within the binuclear helicates found in complexes **3** (left) and **4** (right).

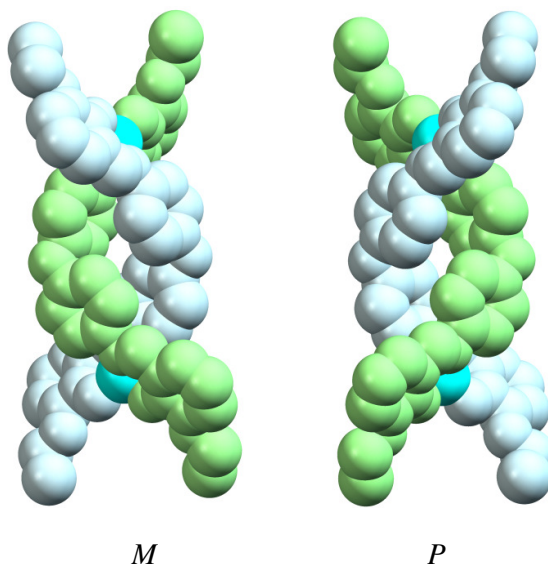

**Fig. S13.** Space-filling representations of the two independent  $[Zn_2(L^2)_2]$  complexes found in complex **4** with *M*- and *P*-helicity.

**Table S6.** H-bond parameters found in complex **3**.

| D-H...A       | D-H(Å) | H...A(Å) | D...A (Å) | <D-H-A(°) | Symmetry <sup>#</sup> |
|---------------|--------|----------|-----------|-----------|-----------------------|
| O8-H8A...O1   | 0.84   | 2.05     | 2.881     | 173       | 0                     |
| C1-H1...N7    | 0.950  | 2.46     | 3.379     | 164       | 0                     |
| C4-H4...N8    | 0.950  | 2.62     | 3.571     | 175       | 2                     |
| C49-H49...O3  | 0.950  | 2.58     | 3.327     | 136       | 1                     |
| C53-H53A...O8 | 0.98   | 2.59     | 3.535     | 162       | 3                     |
| C55-H55B...O8 | 0.98   | 2.51     | 3.247     | 132       | 3                     |
| C80-H80C...O2 | 0.98   | 2.57     | 3.423     | 146       | 0                     |

<sup>#</sup> (0) x,y,z (1) x,-1+y,1+z (2) 1-x,1-y,-z (3) 1-x,1-y,1-z

**Table S7.** H-bond parameters found in complex **4**.

| D-H...A       | D-H(Å) | H...A(Å) | D...A (Å) | <D-H-A(°) | Symmetry <sup>#</sup> |
|---------------|--------|----------|-----------|-----------|-----------------------|
| C45-H45...O2  | 0.930  | 2.996    | 3.784     | 143.47    | 1                     |
| C50-H50...O8  | 0.930  | 2.989    | 3.795     | 145.79    | 1                     |
| C38-H38...O6  | 0.930  | 2.508    | 3.323     | 146.43    | 2                     |
| C37-H37...O2  | 0.930  | 2.892    | 3.304     | 108.27    | 3                     |
| C53-H53B...O9 | 0.960  | 2.708    | 3.655     | 168.96    | 4                     |

<sup>#</sup> (1) -x+1,+y,-z+1/2 (2) x-1/2,+y-1/2,+z (3) x-1/2,-y+1/2,+z-1/2 (4) -x+1,-y+1,-z+1

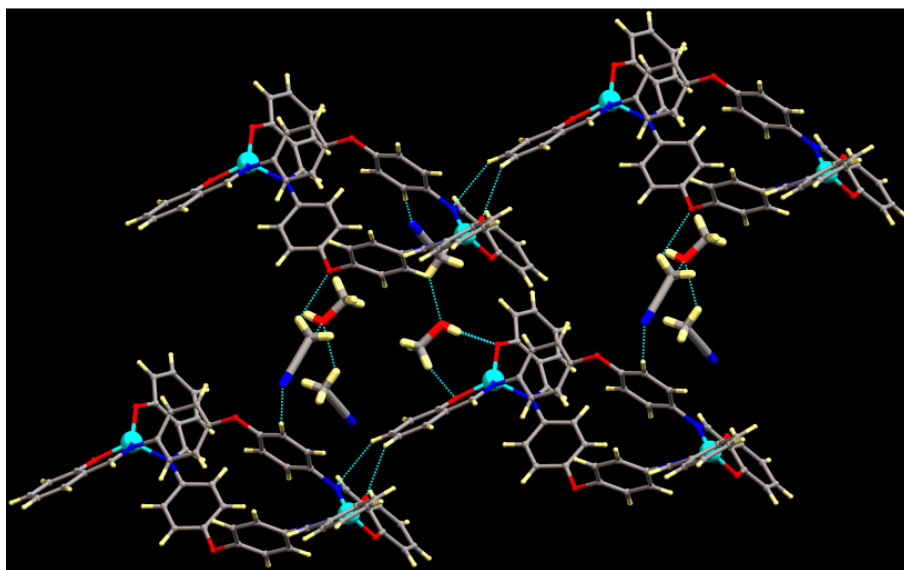

**Fig. S14.** A view of supramolecular 2D arrangement of complex **3** through intermolecular H-bonding interactions.

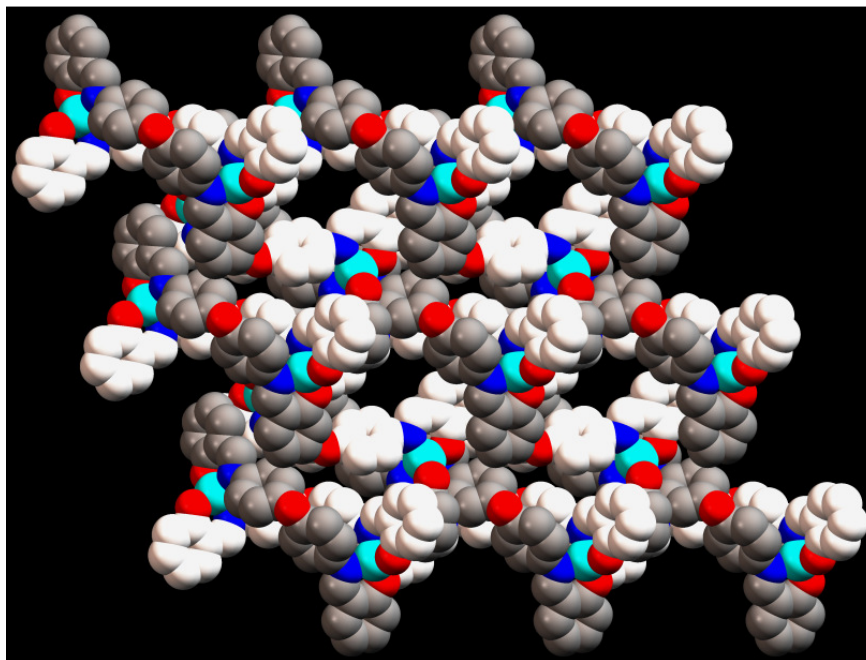

**Fig. S15.** A view of de-solvated framework of **3** emphasizing the supramolecular interactions.



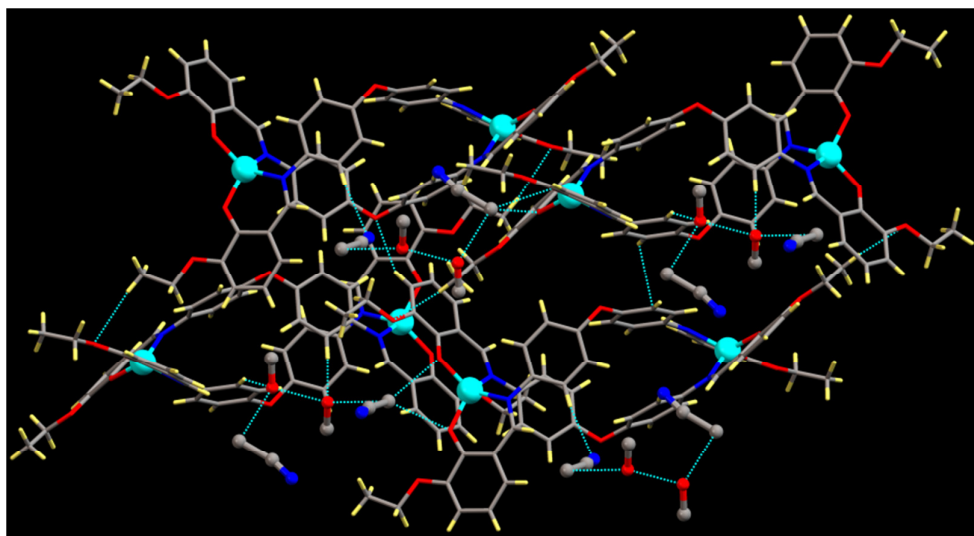

**Fig. S16.** A view of supramolecular 2D arrangement of complex **4** through intermolecular H-bonding interactions.

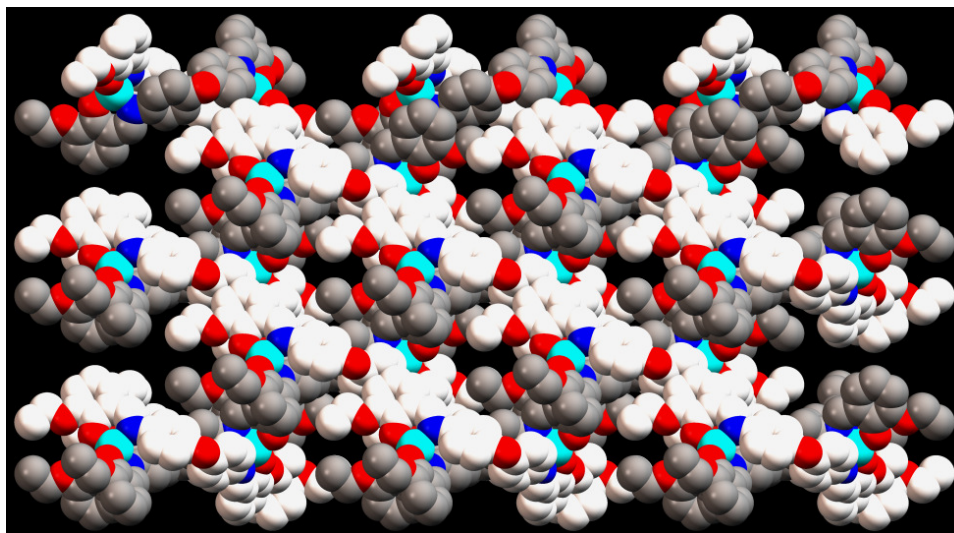

**Fig. S17.** A view of de-solvated framework of **4** emphasizing the supramolecular interactions.

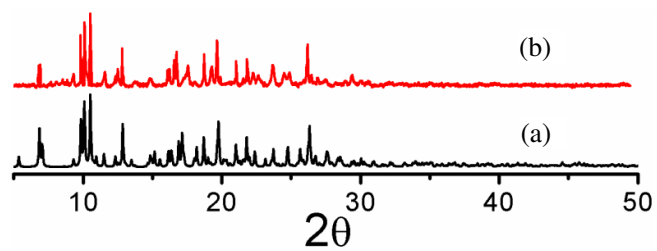

**Fig. S18.** PXRD patterns of **1**; (a) simulated, (b) as-synthesized.

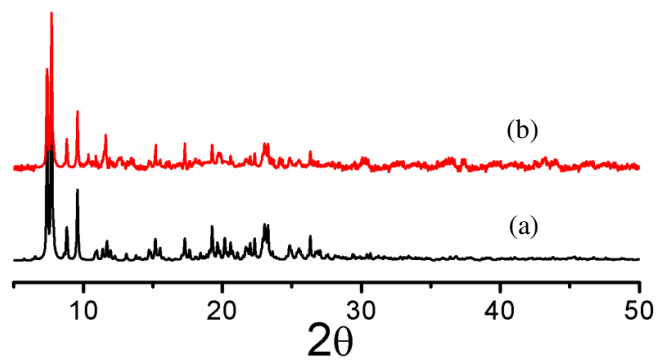

**Fig. S19.** PXRD patterns of **2**; (a) simulated, (b) as-synthesized.

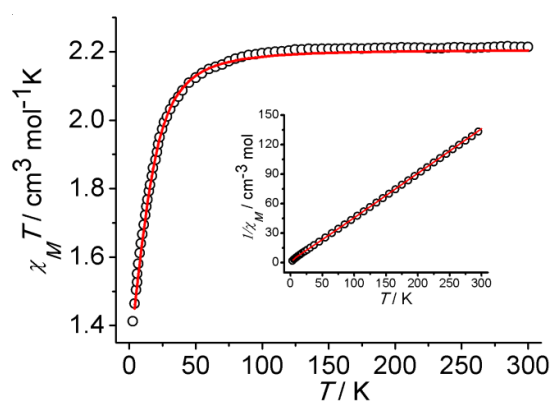

**Fig. S20.**  $\chi_M T$  vs.  $T$  plot measured at 0.1 T for complex **1** and  $1/\chi_M$  vs.  $T$  plot shown in the inset. The red lines are the best fit.

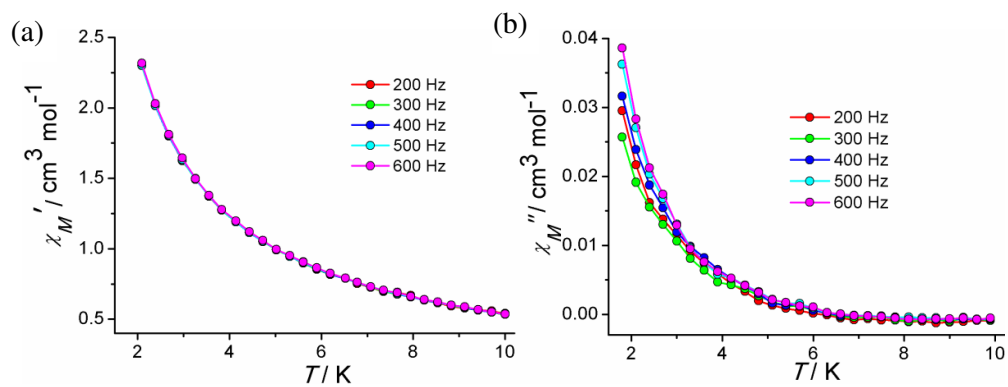

**Fig. S21.** (a) In-phase ( $\chi_M'$ ) and (b) Out-of-phase ( $\chi_M''$ ) AC magnetic susceptibility plots for complex **1** at 0 Oe.

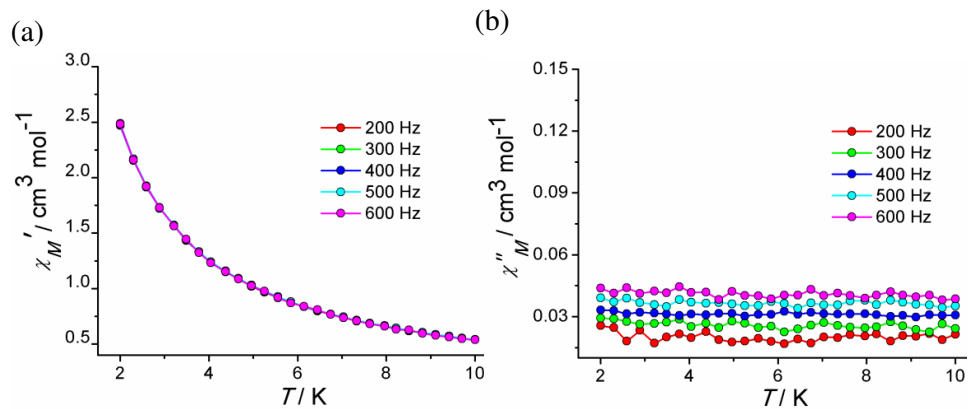

**Fig. S22.** (a) In-phase ( $\chi_M'$ ) and (b) Out-of-phase ( $\chi_M''$ ) AC magnetic susceptibility plots for complex **2** at 0 Oe.

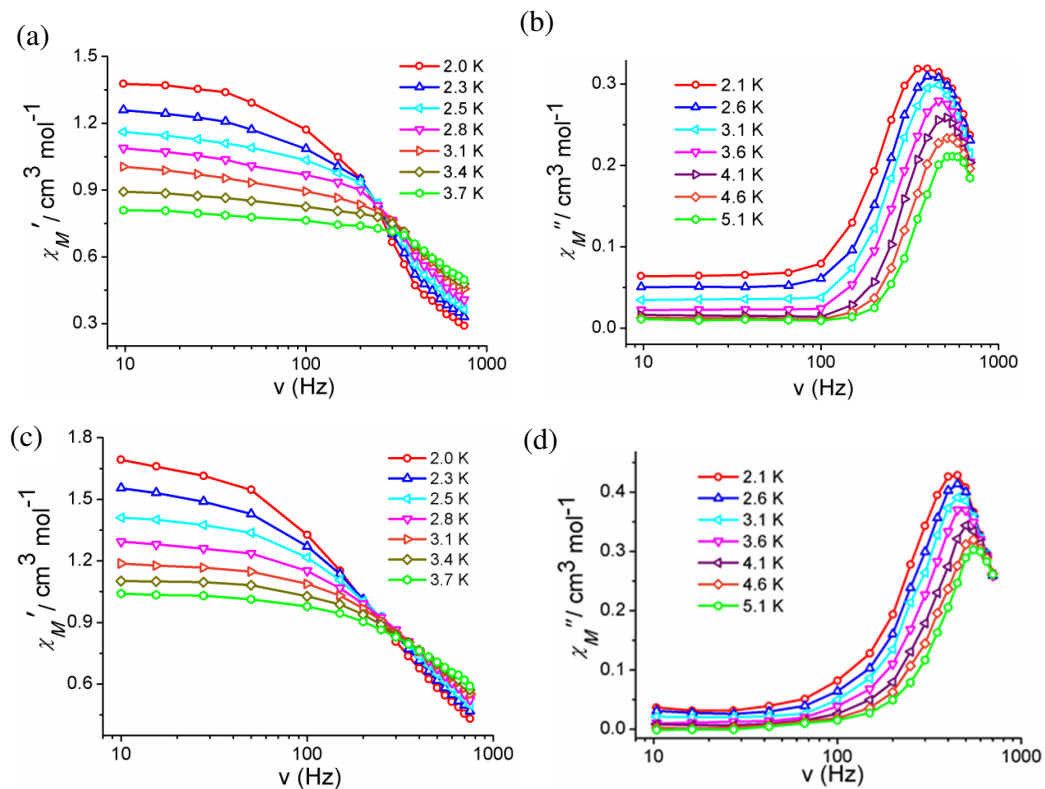

**Fig. S23.** Frequency dependency of the in-phase (a and c) and out-of phase (b and d) ac susceptibility plots for complexes **1** and **2** under 1000 Oe dc field.

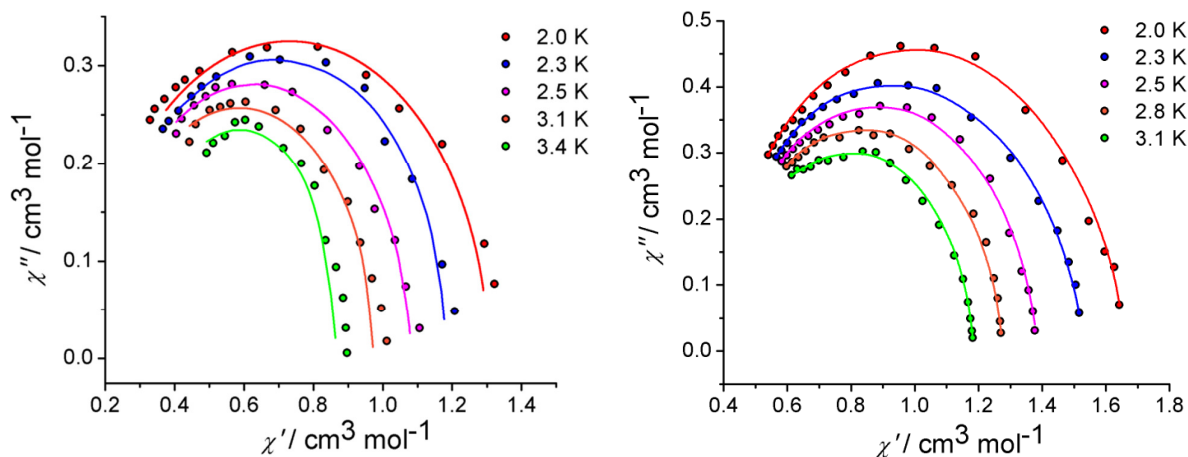

**Fig. S24.** Cole-Cole plots for complex **1** (left) and **2** (right). Solid lines represent the best fit.

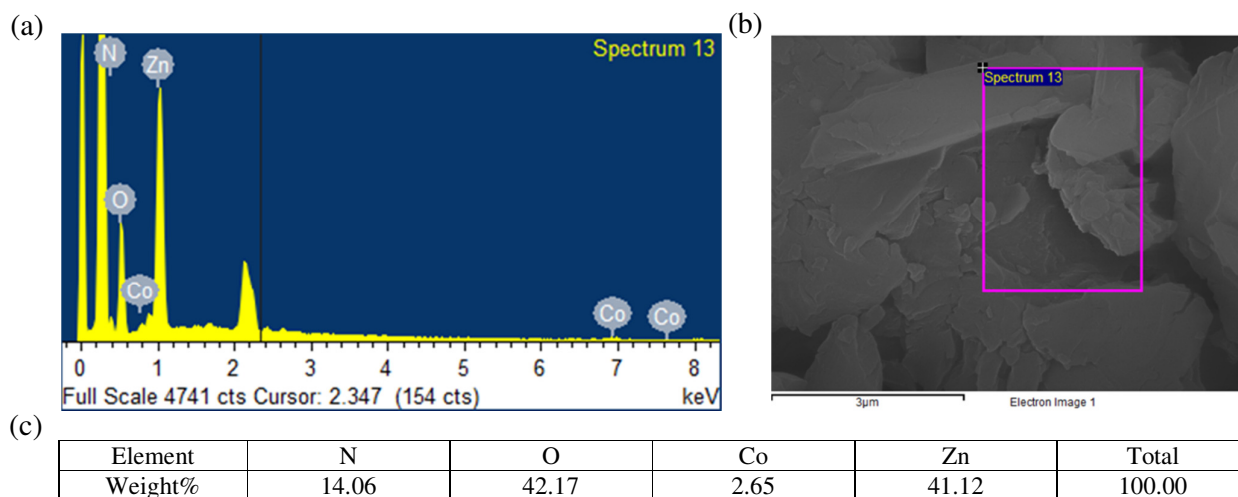

**Fig. S25.** (a) EDS, and (b) SEM image of diluted sample, (c) elemental analysis from EDS.

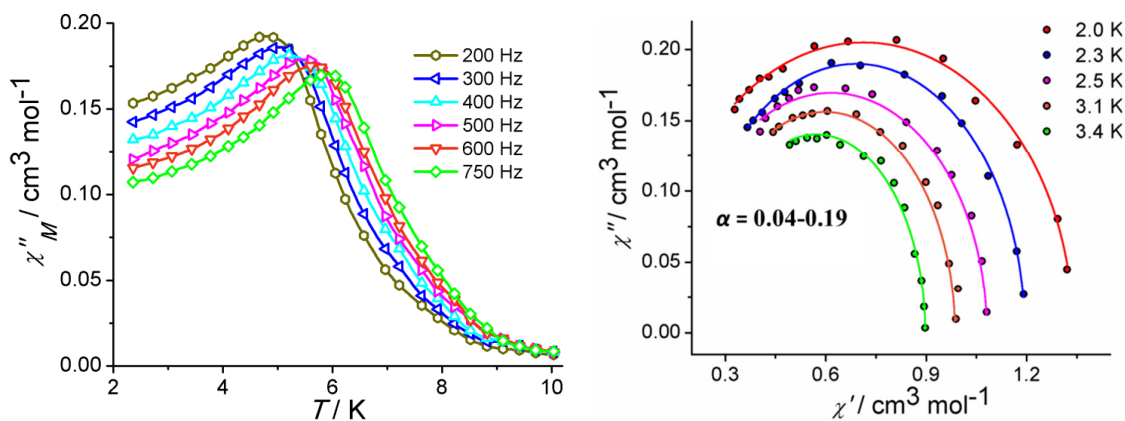

**Fig. S26.** Out-of-phase ( $\chi_M''$ ) ac magnetic susceptibility plot for diluted sample at 1000 Oe dc field (left) and Cole-Cole plots for diluted sample (right). Solid lines represent the best fit.

## Shape analysis

**Table S8:** Summary of SHAPE analysis around Co<sup>II</sup> centers of complex **1** and **2**.

|         |   |                 |                           |
|---------|---|-----------------|---------------------------|
| SP-4    | 1 | D <sub>4h</sub> | Square                    |
| T-4     | 2 | T <sub>d</sub>  | Tetrahedron               |
| SS-4    | 3 | C <sub>2v</sub> | Seesaw                    |
| vTBPY-4 | 4 | C <sub>3v</sub> | Vacant trigonal bipyramid |

### Complex 1:

| Structure [ML <sub>4</sub> ] | SP-4    | T-4           | SS-4   | vTBPY-4 |
|------------------------------|---------|---------------|--------|---------|
| Co1                          | 22.139, | <b>2.150,</b> | 6.399, | 4.989,  |

### Complex 2:

| Structure [ML <sub>4</sub> ] | SP-4    | T-4           | SS-4   | vTBPY-4 |
|------------------------------|---------|---------------|--------|---------|
| Co1                          | 18.301, | <b>3.345,</b> | 5.568, | 6.379,  |

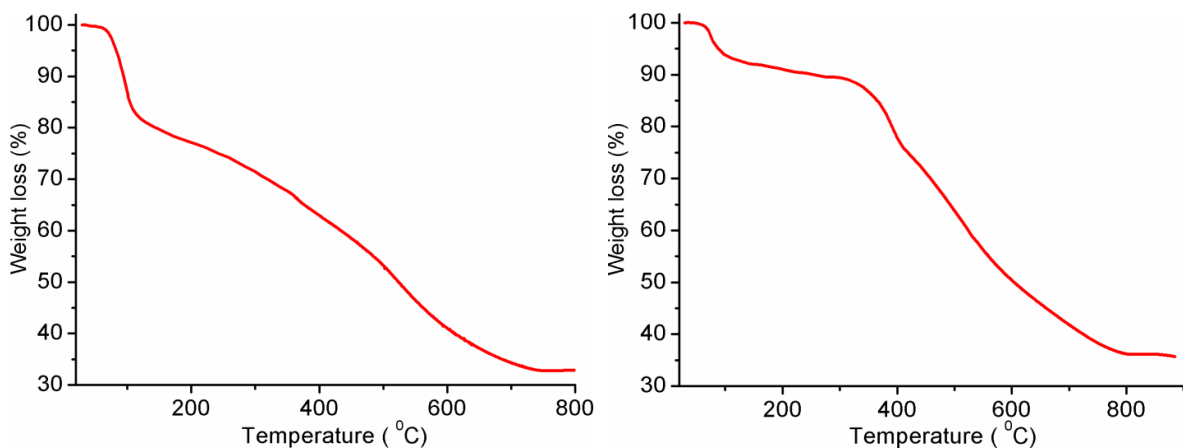

**Fig. S27.** Thermogravimetric profiles for complexes **2** (left) and **4** (right).
